# Supplementary material for: The Role of the Trypanosoma cruzi TcNRBD1 Protein in Translation
Source: PubMed Central journal article supplement (PMC5070865; doi:10.1371/journal.pone.0164650), 2016-10-19
Supplement: pone.0164650.s007.pdf [file pone.0164650.s007.pdf]

**S1 Table:** Proteins identified by proteomic analysis in epimastigotes.

| ID                                                                                               | Description                                              | Spectral count |
|--------------------------------------------------------------------------------------------------|----------------------------------------------------------|----------------|
| Tc00.1047053510593.10                                                                            | Hypothetical protein, conserved                          | 7              |
| Tc00.1047053511211.40                                                                            | Molybdenum cofactor biosynthesis, putative               | 6              |
| Tc00.1047053509717.20<br>Tc00.1047053510105.170                                                  | Dihydrolipoamide acetyltransferase precursor, putative   | 9              |
| Tc00.1047053510565.30<br>Tc00.1047053508503.20                                                   | Cytochrome c oxidase subunit V, putative                 | 11             |
| Tc00.1047053506943.60<br>Tc00.1047053509065.70<br>Tc00.1047053506943.50<br>Tc00.1047053509065.60 | Glyceraldehyde 3-phosphate dehydrogenase, putative       | 7              |
| Tc00.1047053510877.40<br>Tc00.1047053510877.30                                                   | Hypothetical protein, conserved                          | 18             |
| Tc00.1047053511231.80<br>Tc00.1047053504017.10                                                   | Basic transcription factor 3a, putative                  | 10             |
| Tc00.1047053511319.20<br>Tc00.1047053510055.50                                                   | Hypothetical protein, conserved                          | 6              |
| Tc00.1047053508675.20<br>Tc00.1047053506337.30                                                   | SNF7-like protein, putative                              | 9              |
| Tc00.1047053511727.270<br>Tc00.1047053511727.290                                                 | RNA-binding protein, putative                            | 9              |
| Tc00.1047053510029.70<br>Tc00.1047053510973.30<br>Tc00.1047053511189.30<br>Tc00.1047053511291.90 | 40S ribosomal protein S13, putative                      | 8              |
| Tc00.1047053506113.60<br>Tc00.1047053507881.20                                                   | Retrotransposon hot spot (RHS) protein, putative         | 7              |
| Tc00.1047053506961.10                                                                            | Retrotransposon hot spot (RHS) protein, putative         | 6              |
| Tc00.1047053504863.10                                                                            | Retrotransposon hot spot (RHS) protein, putative         | 9              |
| Tc00.1047053508323.100                                                                           | I/6 autoantigen, putative                                | 10             |
| Tc00.1047053509693.80                                                                            | Hypoxanthine-guanine phosphoribosyltransferase, putative | 6              |
| Tc00.1047053504089.70<br>Tc00.1047053504001.20                                                   | Hypothetical protein, conserved                          | 9              |
