# Supplementary material for: The Role of the Trypanosoma cruzi TcNRBD1 Protein in Translation
Source: PubMed Central journal article supplement (PMC5070865; doi:10.1371/journal.pone.0164650), 2016-10-19
Supplement: pone.0164650.s008.pdf [file pone.0164650.s008.pdf]

**S2 Table:** Proteins identified by proteomic analysis in epimastigotes under nutritional stress.

| ID                                                                                                   | Description                             | Spectral count |
|------------------------------------------------------------------------------------------------------|-----------------------------------------|----------------|
| Tc00.1047053503405.10                                                                                | Glutamine synthetase, putative          | 7              |
| Tc00.1047053509793.50                                                                                | Hypothetical protein, conserved         | 7              |
| Tc00.1047053509151.140                                                                               | 60S ribosomal protein L23a, putative    | 6              |
| Tc00.1047053510767.20                                                                                | 60S ribosomal protein L36, putative     | 8              |
| Tc00.1047053506977.49<br>Tc00.1047053509671.64                                                       | Ribosomal protein L36, putative         | 8              |
| Tc00.1047053511211.160<br>Tc00.1047053511211.170<br>Tc00.1047053510439.61                            | Heat shock protein 70 (HSP70), putative | 7              |
| Tc00.1047053510089.110<br>Tc00.1047053510421.130                                                     | Hypothetical protein, conserved         | 7              |
| Tc00.1047053510755.129<br>Tc00.1047053508413.44<br>Tc00.1047053511071.171<br>Tc00.1047053504037.30   | 60S ribosomal protein L12, putative     | 9              |
| Tc00.1047053506297.160<br>Tc00.1047053506297.150<br>Tc00.1047053510101.170<br>Tc00.1047053510101.180 | 40S ribosomal protein S5, putative      | 8              |
| Tc00.1047053508475.10<br>Tc00.1047053508823.120<br>Tc00.1047053508823.140                            | Ribosomal protein S20, putative         | 10             |
