# Supplementary material for: The Role of the Trypanosoma cruzi TcNRBD1 Protein in Translation
Source: PubMed Central journal article supplement (PMC5070865; doi:10.1371/journal.pone.0164650), 2016-10-19
Supplement: pone.0164650.s009.pdf [file pone.0164650.s009.pdf]

**S3 Table:** mRNAs associated to TcNRBD1-mRNP in epimastigotes.

| Feature ID       | Product                                                    | Baggerley's test: 270 EPI vs Cont Weighted proportions log fold change | Baggerley's test: 270 EPI vs Cont - FDR p-value correction | Cont - Normalized means | 270 EPI - Normalized means |
|------------------|------------------------------------------------------------|------------------------------------------------------------------------|------------------------------------------------------------|-------------------------|----------------------------|
| TcCLB.510719.160 | 60S ribosomal protein L22, putative                        | 1024,00                                                                | 0,46%                                                      | 0,00                    | 216,17                     |
| TcCLB.507773.34  | 60S ribosomal protein L37, putative                        | 1024,00                                                                | 0,10%                                                      | 0,00                    | 92,29                      |
| TcCLB.506577.54  | 60S ribosomal protein L6, putative                         | 1024,00                                                                | 0,36%                                                      | 0,00                    | 59,21                      |
| TcCLB.504047.34  | acylphosphatase, putative                                  | 1024,00                                                                | 0,00%                                                      | 0,00                    | 88,13                      |
| TcCLB.504071.110 | ama1 protein, putative                                     | 1024,00                                                                | 0,00%                                                      | 0,00                    | 92,24                      |
| TcCLB.510801.10  | calpain-like cysteine peptidase, putative                  | 2,07                                                                   | 0,00%                                                      | 26,40                   | 111,18                     |
| TcCLB.506445.30  | cation transporter, putative                               | 2,94                                                                   | 0,72%                                                      | 6,71                    | 51,50                      |
| TcCLB.508173.60  | cis-prenyltransferase, putative                            | 1024,00                                                                | 0,01%                                                      | 0,00                    | 62,93                      |
| TcCLB.503581.39  | coatomer delta subunit, putative                           | 1024,00                                                                | 0,31%                                                      | 0,00                    | 65,67                      |
| TcCLB.510661.250 | cystathione gamma lyase, putative                          | 2,04                                                                   | 0,00%                                                      | 33,46                   | 138,04                     |
| TcCLB.511907.200 | cysteine peptidase inhibitor, putative, chagasin, putative | 2,65                                                                   | 0,00%                                                      | 41,10                   | 258,77                     |
| TcCLB.507949.4   | cytidine triphosphate synthase, putative                   | 1024,00                                                                | 0,01%                                                      | 0,00                    | 78,30                      |
| TcCLB.503653.60  | cytochrome b-domain protein, putative                      | 2,07                                                                   | 0,67%                                                      | 14,48                   | 60,88                      |
| TcCLB.511025.110 | dihydrolipoyl dehydrogenase, putative                      | 2,96                                                                   | 0,00%                                                      | 9,54                    | 74,11                      |

|                  |                                                               |         |       |       |        |
|------------------|---------------------------------------------------------------|---------|-------|-------|--------|
| TcCLB.504175.40  | dual specificity protein phosphatase, putative                | 2,09    | 0,01% | 27,78 | 118,69 |
| TcCLB.506679.70  | eukaryotic translation initiation factor 6 (eIF-6), putative  | 3,02    | 0,00% | 15,06 | 122,26 |
| TcCLB.508827.30  | eukaryotic translation initiation factor, putative            | 2,57    | 0,41% | 19,92 | 118,57 |
| TcCLB.508369.20  | farnesyltransferase, putative,squalene synthase, putative     | 2,62    | 0,37% | 11,26 | 69,48  |
| TcCLB.508737.70  | fatty acid desaturase, putative                               | 2,52    | 0,00% | 22,09 | 127,10 |
| TcCLB.510669.20  | Gim5A protein, putative,glycosomal membrane protein, putative | 1024,00 | 0,00% | 0,00  | 55,15  |
| TcCLB.508479.110 | glutathionylspermidine synthase, putative                     | 3,51    | 0,00% | 6,34  | 72,21  |
| TcCLB.510283.70  | glycosyl hydrolase-like protein, putative                     | 2,29    | 0,12% | 38,88 | 190,44 |
| TcCLB.510819.60  | heat shock protein HslVU, ATPase subunit HslU, putative       | 1024,00 | 0,36% | 0,00  | 49,90  |
| TcCLB.504071.40  | hypothetical protein                                          | 1024,00 | 0,00% | 0,00  | 92,39  |
| TcCLB.506499.60  | hypothetical protein                                          | 1024,00 | 0,00% | 0,00  | 91,54  |
| TcCLB.503411.10  | hypothetical protein                                          | 1024,00 | 0,00% | 0,00  | 86,03  |
| TcCLB.506573.5   | hypothetical protein                                          | 1024,00 | 0,00% | 0,00  | 77,20  |
| TcCLB.508099.40  | hypothetical protein                                          | 1024,00 | 0,00% | 0,00  | 64,07  |
| TcCLB.510721.21  | hypothetical protein                                          | 1024,00 | 0,12% | 0,00  | 61,87  |
| TcCLB.509521.10  | hypothetical protein                                          | 1024,00 | 0,00% | 0,00  | 57,88  |
| TcCLB.511605.10  | hypothetical protein                                          | 1024,00 | 0,00% | 0,00  | 57,86  |
| TcCLB.504081.370 | hypothetical protein                                          | 1024,00 | 0,02% | 0,00  | 55,13  |
| TcCLB.504239.150 | hypothetical protein                                          | 1024,00 | 0,43% | 0,00  | 54,15  |
| TcCLB.506821.10  | hypothetical protein                                          | 1024,00 | 0,12% | 0,00  | 53,76  |
| TcCLB.506765.43  | hypothetical protein                                          | 1024,00 | 0,36% | 0,00  | 52,69  |
| TcCLB.508355.270 | hypothetical protein                                          | 1024,00 | 0,01% | 0,00  | 52,40  |
| TcCLB.511385.70  | hypothetical protein                                          | 1024,00 | 0,00% | 0,00  | 51,79  |

|                  |                                    |         |       |       |        |
|------------------|------------------------------------|---------|-------|-------|--------|
| TcCLB.511815.90  | hypothetical protein               | 2,94    | 0,69% | 8,21  | 62,98  |
| TcCLB.510479.30  | hypothetical protein               | 2,88    | 0,00% | 27,32 | 200,51 |
| TcCLB.507517.50  | hypothetical protein               | 2,86    | 0,07% | 10,07 | 73,02  |
| TcCLB.511223.10  | hypothetical protein               | 2,80    | 0,42% | 26,84 | 187,10 |
| TcCLB.508243.36  | hypothetical protein               | 2,73    | 0,00% | 15,31 | 101,82 |
| TcCLB.509039.40  | hypothetical protein               | 2,56    | 0,00% | 24,79 | 146,40 |
| TcCLB.506993.190 | hypothetical protein               | 2,32    | 0,02% | 17,89 | 89,49  |
| TcCLB.506705.50  | hypothetical protein               | 2,30    | 0,00% | 14,14 | 69,68  |
| TcCLB.511593.65  | hypothetical protein               | 2,13    | 0,09% | 17,02 | 74,53  |
| TcCLB.506529.541 | hypothetical protein               | 2,11    | 0,00% | 15,68 | 67,53  |
| TcCLB.509295.90  | hypothetical protein               | 2,09    | 0,00% | 17,75 | 75,54  |
| TcCLB.511771.75  | hypothetical protein               | 2,07    | 0,76% | 82,95 | 347,69 |
| TcCLB.506989.110 | hypothetical protein,<br>conserved | 1024,00 | 0,00% | 0,00  | 159,68 |
| TcCLB.506247.310 | hypothetical protein,<br>conserved | 1024,00 | 0,00% | 0,00  | 134,35 |
| TcCLB.463451.4   | hypothetical protein,<br>conserved | 1024,00 | 1,29% | 0,00  | 117,38 |
| TcCLB.511159.30  | hypothetical protein,<br>conserved | 1024,00 | 0,00% | 0,00  | 100,83 |
| TcCLB.506869.30  | hypothetical protein,<br>conserved | 1024,00 | 1,29% | 0,00  | 85,20  |
| TcCLB.503449.14  | hypothetical protein,<br>conserved | 1024,00 | 0,00% | 0,00  | 84,05  |
| TcCLB.428403.5   | hypothetical protein,<br>conserved | 1024,00 | 0,02% | 0,00  | 76,50  |
| TcCLB.510877.190 | hypothetical protein,<br>conserved | 1024,00 | 0,12% | 0,00  | 75,99  |
| TcCLB.511181.150 | hypothetical protein,<br>conserved | 1024,00 | 0,36% | 0,00  | 73,87  |
| TcCLB.509231.39  | hypothetical protein,<br>conserved | 1024,00 | 0,12% | 0,00  | 72,71  |
| TcCLB.511393.49  | hypothetical protein,<br>conserved | 1024,00 | 0,01% | 0,00  | 71,20  |
| TcCLB.509571.4   | hypothetical protein,<br>conserved | 1024,00 | 0,00% | 0,00  | 69,18  |

|                  |                                    |         |       |      |       |
|------------------|------------------------------------|---------|-------|------|-------|
| TcCLB.511509.21  | hypothetical protein,<br>conserved | 1024,00 | 0,01% | 0,00 | 67,88 |
| TcCLB.509967.10  | hypothetical protein,<br>conserved | 1024,00 | 0,00% | 0,00 | 67,09 |
| TcCLB.509161.120 | hypothetical protein,<br>conserved | 1024,00 | 1,17% | 0,00 | 66,86 |
| TcCLB.508173.84  | hypothetical protein,<br>conserved | 1024,00 | 0,00% | 0,00 | 66,31 |
| TcCLB.506221.70  | hypothetical protein,<br>conserved | 1024,00 | 0,00% | 0,00 | 62,77 |
| TcCLB.504077.30  | hypothetical protein,<br>conserved | 1024,00 | 0,00% | 0,00 | 60,81 |
| TcCLB.506265.110 | hypothetical protein,<br>conserved | 1024,00 | 0,00% | 0,00 | 60,76 |
| TcCLB.508879.70  | hypothetical protein,<br>conserved | 1024,00 | 0,01% | 0,00 | 58,28 |
| TcCLB.507765.90  | hypothetical protein,<br>conserved | 1024,00 | 0,00% | 0,00 | 58,21 |
| TcCLB.506567.74  | hypothetical protein,<br>conserved | 1024,00 | 0,10% | 0,00 | 56,84 |
| TcCLB.508209.159 | hypothetical protein,<br>conserved | 1024,00 | 0,09% | 0,00 | 55,42 |
| TcCLB.506625.150 | hypothetical protein,<br>conserved | 1024,00 | 0,36% | 0,00 | 54,18 |
| TcCLB.510359.220 | hypothetical protein,<br>conserved | 1024,00 | 0,02% | 0,00 | 53,09 |
| TcCLB.507645.50  | hypothetical protein,<br>conserved | 1024,00 | 0,00% | 0,00 | 52,10 |
| TcCLB.509601.100 | hypothetical protein,<br>conserved | 1024,00 | 0,12% | 0,00 | 51,42 |
| TcCLB.511753.90  | hypothetical protein,<br>conserved | 1024,00 | 0,12% | 0,00 | 49,78 |
| TcCLB.506237.19  | hypothetical protein,<br>conserved | 1024,00 | 1,09% | 0,00 | 49,71 |
| TcCLB.507677.160 | hypothetical protein,<br>conserved | 3,46    | 0,05% | 7,53 | 82,99 |

|                  |                                    |      |       |       |        |
|------------------|------------------------------------|------|-------|-------|--------|
| TcCLB.508951.70  | hypothetical protein,<br>conserved | 3,33 | 0,00% | 5,32  | 53,44  |
| TcCLB.508461.300 | hypothetical protein,<br>conserved | 3,27 | 0,03% | 7,62  | 73,71  |
| TcCLB.506151.10  | hypothetical protein,<br>conserved | 3,02 | 0,00% | 6,15  | 49,92  |
| TcCLB.506505.50  | hypothetical protein,<br>conserved | 2,97 | 0,00% | 6,41  | 50,11  |
| TcCLB.511111.40  | hypothetical protein,<br>conserved | 2,96 | 0,00% | 7,89  | 61,29  |
| TcCLB.511215.40  | hypothetical protein,<br>conserved | 2,73 | 1,14% | 8,81  | 58,53  |
| TcCLB.509837.20  | hypothetical protein,<br>conserved | 2,72 | 0,05% | 9,18  | 60,52  |
| TcCLB.504717.20  | hypothetical protein,<br>conserved | 2,72 | 0,05% | 7,89  | 52,04  |
| TcCLB.506925.270 | hypothetical protein,<br>conserved | 2,69 | 0,00% | 13,97 | 90,15  |
| TcCLB.510879.150 | hypothetical protein,<br>conserved | 2,68 | 0,00% | 20,19 | 129,20 |
| TcCLB.509911.130 | hypothetical protein,<br>conserved | 2,66 | 0,00% | 12,35 | 78,27  |
| TcCLB.508711.40  | hypothetical protein,<br>conserved | 2,59 | 0,00% | 9,33  | 56,23  |
| TcCLB.509795.30  | hypothetical protein,<br>conserved | 2,50 | 0,00% | 9,71  | 55,06  |
| TcCLB.451263.9   | hypothetical protein,<br>conserved | 2,47 | 0,00% | 16,10 | 89,36  |
| TcCLB.507649.90  | hypothetical protein,<br>conserved | 2,47 | 0,05% | 28,16 | 155,77 |
| TcCLB.510187.130 | hypothetical protein,<br>conserved | 2,47 | 0,08% | 9,35  | 51,71  |
| TcCLB.507711.230 | hypothetical protein,<br>conserved | 2,37 | 0,01% | 10,61 | 54,95  |
| TcCLB.511491.140 | hypothetical protein,<br>conserved | 2,36 | 0,00% | 20,64 | 106,32 |

|                  |                                                     |         |       |        |        |
|------------------|-----------------------------------------------------|---------|-------|--------|--------|
| TcCLB.506925.20  | hypothetical protein,<br>conserved                  | 2,32    | 0,03% | 13,66  | 68,32  |
| TcCLB.509461.70  | hypothetical protein,<br>conserved                  | 2,30    | 0,62% | 10,14  | 49,99  |
| TcCLB.506933.70  | hypothetical protein,<br>conserved                  | 2,22    | 0,00% | 21,88  | 101,85 |
| TcCLB.507031.150 | hypothetical protein,<br>conserved                  | 2,22    | 0,01% | 12,69  | 58,95  |
| TcCLB.508569.10  | hypothetical protein,<br>conserved                  | 2,14    | 0,00% | 15,28  | 67,35  |
| TcCLB.508409.110 | hypothetical protein,<br>conserved                  | 2,13    | 0,00% | 34,69  | 151,99 |
| TcCLB.510727.9   | hypothetical protein,<br>conserved                  | 2,11    | 0,00% | 23,06  | 99,55  |
| TcCLB.507675.30  | hypothetical protein,<br>conserved                  | 2,11    | 0,00% | 19,09  | 82,23  |
| TcCLB.511737.50  | hypothetical protein,<br>conserved                  | 2,07    | 0,16% | 100,43 | 421,44 |
| TcCLB.511421.210 | hypothetical protein,<br>conserved                  | 2,04    | 0,00% | 24,93  | 102,84 |
| TcCLB.508797.29  | hypothetical protein,<br>conserved                  | 2,03    | 0,30% | 15,30  | 62,40  |
| TcCLB.507073.30  | hypothetical protein,<br>conserved                  | 2,03    | 0,16% | 18,52  | 75,53  |
| TcCLB.510879.140 | hypothetical protein,<br>conserved                  | 2,02    | 0,00% | 48,28  | 196,00 |
| TcCLB.504625.70  | kinetoplast DNA-<br>associated protein,<br>putative | 3,07    | 0,00% | 8,16   | 68,52  |
| TcCLB.511633.79  | microtubule-associated<br>protein, putative         | 2,69    | 0,00% | 8,36   | 53,99  |
| TcCLB.508461.284 | mitochondrial carrier<br>protein, putative          | 2,11    | 0,00% | 12,30  | 52,97  |
| TcCLB.504167.20  | mucin TcMUCI, putative                              | 1024,00 | 0,00% | 0,00   | 90,65  |
| TcCLB.508119.30  | mucin TcMUCII,<br>putative                          | 1024,00 | 0,02% | 0,00   | 50,61  |

|                  |                                                                                                               |         |       |       |        |
|------------------|---------------------------------------------------------------------------------------------------------------|---------|-------|-------|--------|
| TcCLB.511849.30  | mucin-associated surface protein (MASP), putative                                                             | 1024,00 | 0,01% | 0,00  | 50,68  |
| TcCLB.506965.140 | mucin-associated surface protein (MASP), putative                                                             | 2,09    | 0,00% | 37,81 | 161,13 |
| TcCLB.505843.40  | NAD/FAD dependent dehydrogenase, putative                                                                     | 1024,00 | 0,00% | 0,00  | 55,62  |
| TcCLB.509567.40  | nuclear transport factor 2, putative                                                                          | 1024,00 | 0,02% | 0,00  | 78,95  |
| TcCLB.509099.5   | NUP-1 protein, putative                                                                                       | 2,03    | 0,18% | 64,87 | 264,54 |
| TcCLB.505163.80  | oligosaccharyl transferase subunit, putative                                                                  | 2,26    | 0,00% | 11,42 | 54,88  |
| TcCLB.509965.290 | p22 protein precursor, putative                                                                               | 2,73    | 0,00% | 20,19 | 134,26 |
| TcCLB.511065.50  | phosphatidylinositol 3-kinase, putative                                                                       | 1024,00 | 0,00% | 0,00  | 75,27  |
| TcCLB.511167.80  | PIF1 helicase-like protein, putative, DNA repair and recombination protein, mitochondrial precursor, putative | 2,47    | 0,08% | 9,77  | 54,04  |
| TcCLB.511483.40  | prefoldin subunit 2, putative                                                                                 | 1024,00 | 0,00% | 0,00  | 51,05  |
| TcCLB.511465.10  | proteasome activator protein PA26, putative                                                                   | 2,19    | 0,04% | 19,33 | 88,12  |
| TcCLB.507775.50  | proteasome alpha 7 subunit, putative                                                                          | 1024,00 | 1,09% | 0,00  | 50,61  |
| TcCLB.509287.20  | protein kinase, putative                                                                                      | 1024,00 | 0,11% | 0,00  | 72,36  |
| TcCLB.510247.10  | R27-2 protein, putative                                                                                       | 2,14    | 0,00% | 14,27 | 62,72  |
| TcCLB.511269.4   | ras-related protein rab-5, putative                                                                           | 1024,00 | 0,00% | 0,00  | 101,20 |
| TcCLB.508647.40  | replication factor C, subunit 1, putative                                                                     | 2,98    | 0,16% | 7,83  | 61,58  |

|                  |                                                                        |         |       |       |        |
|------------------|------------------------------------------------------------------------|---------|-------|-------|--------|
| TcCLB.509875.11  | retrotransposon hot spot (RHS) protein, putative                       | 1024,00 | 0,02% | 0,00  | 88,45  |
| TcCLB.508823.120 | ribosomal protein S20, putative                                        | 1024,00 | 0,00% | 0,00  | 64,46  |
| TcCLB.509233.190 | ribosomal protein S25, putative                                        | 2,37    | 0,00% | 41,10 | 212,76 |
| TcCLB.509317.60  | RNA-binding protein, putative                                          | 1024,00 | 1,05% | 0,00  | 91,26  |
| TcCLB.507519.60  | silent information regulator 2, putative, NAD-dependent SIR2, putative | 1024,00 | 0,28% | 0,00  | 50,76  |
| TcCLB.511819.14  | small nuclear ribonucleoprotein, putative                              | 1024,00 | 0,00% | 0,00  | 59,64  |
| TcCLB.511111.10  | translation initiation factor IF-2, putative                           | 3,69    | 0,00% | 5,46  | 70,74  |
| TcCLB.510707.10  | trans-sialidase, putative                                              | 1024,00 | 1,29% | 0,00  | 194,82 |
| TcCLB.511277.350 | tubulin-specific chaperone, putative                                   | 1024,00 | 0,00% | 0,00  | 97,94  |
| TcCLB.504047.5   | urocanate hydratase, putative                                          | 1024,00 | 0,10% | 0,00  | 154,82 |
| TcCLB.511511.3   | zinc finger protein ZFP1                                               | 1024,00 | 0,00% | 0,00  | 107,23 |
